# Supplementary material for: The cell-free DNA methylome captures distinctions between localized and metastatic prostate tumors
Source: PubMed Central journal article supplement (PMC9617856; doi:10.1038/s41467-022-34012-2), 2022-10-29
Supplement: 41467_2022_34012_MOESM1_ESM.pdf [file 41467_2022_34012_MOESM1_ESM.pdf]

1 **Supplementary information for**

2  
3 **The cell free DNA methylome captures distinctions between localized and**  
4 **metastatic prostate tumors**

5 Sujun Chen<sup>1,2,3,\*</sup>, Jessica Petricca<sup>1,2,\*</sup>, Wenbin Ye<sup>1,4,5,\*</sup>, Jiansheng Guan<sup>1,6</sup>, Yong Zeng<sup>1</sup>,  
6 Nicholas Cheng<sup>2</sup>, Linsey Gong<sup>1,2</sup>, Shu Yi Shen<sup>1</sup>, Junjie T. Hua<sup>7,8</sup>, Megan Crumbaker<sup>9</sup>,  
7 Michael Fraser<sup>1</sup>, Stanley Liu<sup>2,10,11</sup>, Scott V. Bratman<sup>1,2</sup>, Theo van der Kwast<sup>2,12</sup>, Trevor  
8 Pugh<sup>1,2</sup>, Anthony M. Joshua<sup>12</sup>, Daniel D. De Carvalho<sup>1,2</sup>, Kim N. Chi<sup>13</sup>, Philip Awadalla<sup>14</sup>,  
9 Guoli Ji<sup>4, 5, #</sup>, Felix Feng<sup>7,8,15,16,#</sup>, Alexander W. Wyatt<sup>17,#</sup>, Housheng Hansen He<sup>1,2,#</sup>

10

11 **Supplementary Figures**

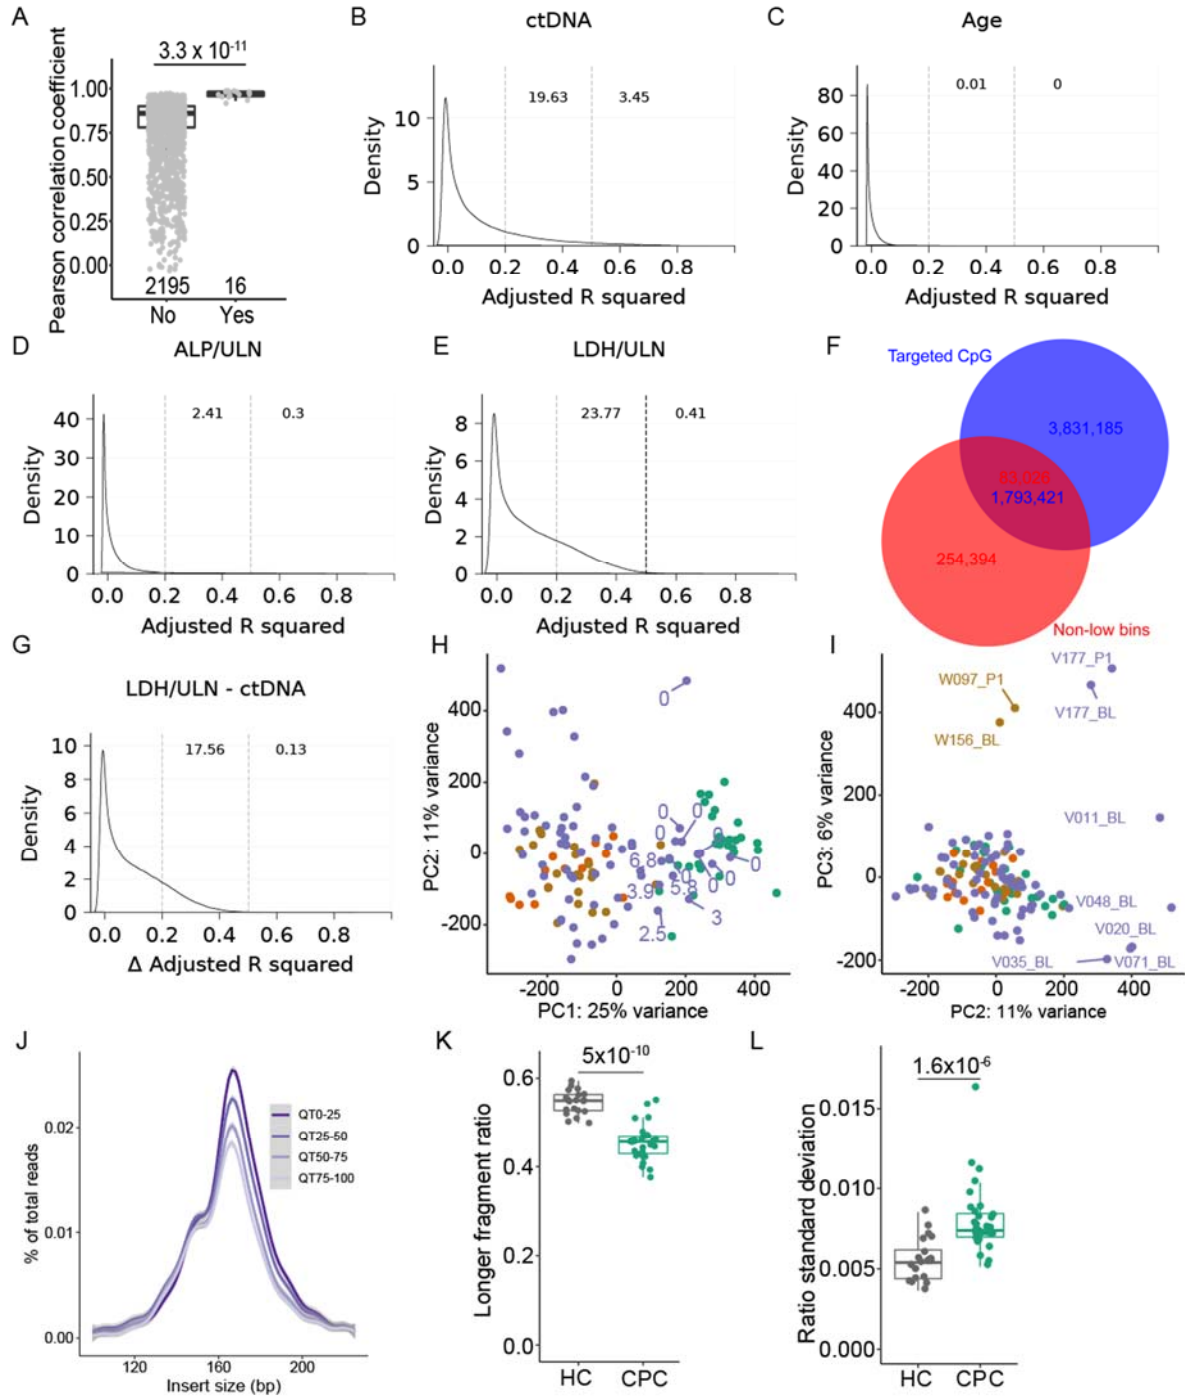

12

13 Supplementary Figure 1. cfMeDIP data captures variation beyond the tumor ctDNA.  
14 Related to Figure 1.

15 A) Pairwise sample correlation using cfMeDIP data, matched samples collected from the  
16 same patient at different timepoints were compared with the others. P value =  $3.3 \times 10^{-11}$   
17 (two-sided Mann-Whitney U test). Box plots represent median values and 0.25 and 0.75  
18 quantiles. Whiskers represent 1.5× interquartile range (IQR). X = 2195 and 16  
19 independent observations for the “No (matched)” and “Yes (unmatched)” groups,  
20 respectively. Density distribution of the adjusted R squared from linear model fitted  
21 using %ctDNA B), age C), ALP/ULN D) and LDH/ULN E) as a variable for all the non-low  
22 bins. Numbers above the plot show the percentage of bins with > 0.2 and > 0.5 adjusted  
23 R squared values. ALP and LDH levels are measured as a ratio to the upper limit of  
24 normal (ULN) level. F) Overlap between the non-low bins and the targeted CpG sites in  
25 the Roche Epi CpGiant Probes. G) Density distribution of the delta adjusted R squared  
26 between a multi-variate linear model using both %ctDNA and LDH/ULN as variables and  
27 a univariate linear model with %ctDNA. Numbers above the plot show the percentage of  
28 bins with > 0.2 and > 0.5 delta adjusted R squared values. Sample distribution between  
29 PC2 and PC1 H); PC2 and PC3 I). J) Size distribution of estimated fragment length for  
30 mCRPC samples from the VPC cohort, samples grouped into four quartile groups  
31 according to %ctDNA levels, with QT0-25 corresponds to samples with lowest %ctDNA.  
32 Distribution of the longer cfDNA fragments K) and standard deviation of fragment ratio L)  
33 within a sample. Two-sided Mann-Whitney U test was used to calculate pairwise p-values  
34 between localized samples from the CPC and the healthy control (HC) samples from  
35 Burgener et al<sup>1</sup>. Box plots represent median values and 0.25 and 0.75 quantiles. Whiskers  
36 represent 1.5× interquartile range (IQR). X = 20 and 30 independent experiments for the  
37 HC and CPC cohorts, respectively, in K) and L). Source data for Supplementary Figures  
38 1A, Supplementary Figures 1H-I and Supplementary Figures 1K-L are provided as a  
39 Source Data file.

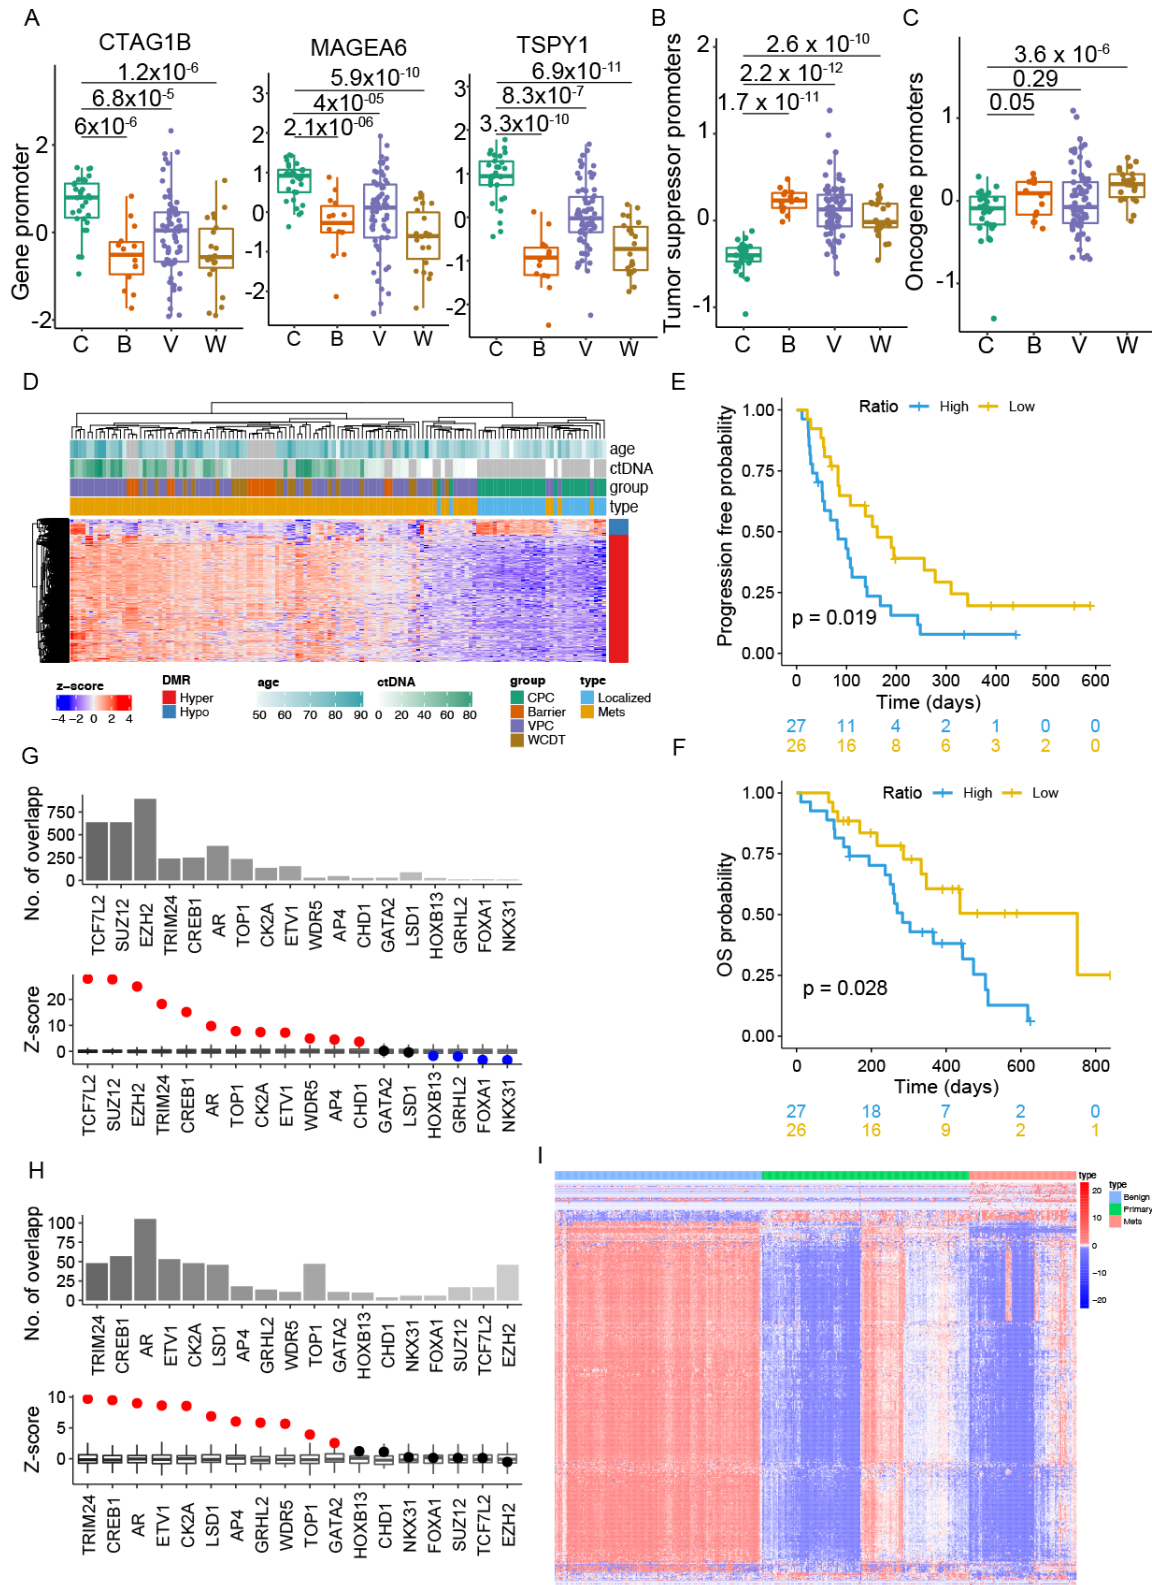

41 Supplementary Figure 2. Characterization of DMRs between localized and metastatic  
42 samples. Related to Figure 2.

43 A) Average methylation level for bins located in the promoters of genes that were  
44 previously identified to be hypomethylated in metastatic tumors<sup>2</sup>. Average methylation  
45 level for bins located in the promoters of prostate cancer related tumor suppressors B)  
46 and oncogenes<sup>3,4</sup> C). Box plots represent median values and 0.25 and 0.75 quantiles.  
47 Two-sided Mann-Whitney U test was used to calculate pairwise p-values in A-C).  
48 Whiskers represent 1.5x interquartile range (IQR). X = 30, 14, 67 and 22 independent  
49 experiments for the CPC, Barrier, VPC and WCDDT cohorts, respectively. D) Normalized  
50 methylation signal for DMRs across all four cohorts. Association of hyper-hypo DMR ratio  
51 with overall survival E) and progression free survival F) in mCRPC samples from the VPC  
52 cohort. Logrank test was used to calculate p-values. X = 27 and 26 independent  
53 observations for the high and low risk groups, respectively for both E) and F). Enrichment  
54 of important transcription factors (TF) on hyper- G) and hypo- H) DMRs. I) Differentially  
55 methylated peaks located within the 1Mb regions flanking the centromere in tissue WGBS  
56 data<sup>5,6</sup>. Source data for Supplementary Figures 2A-C are provided as a Source Data file.

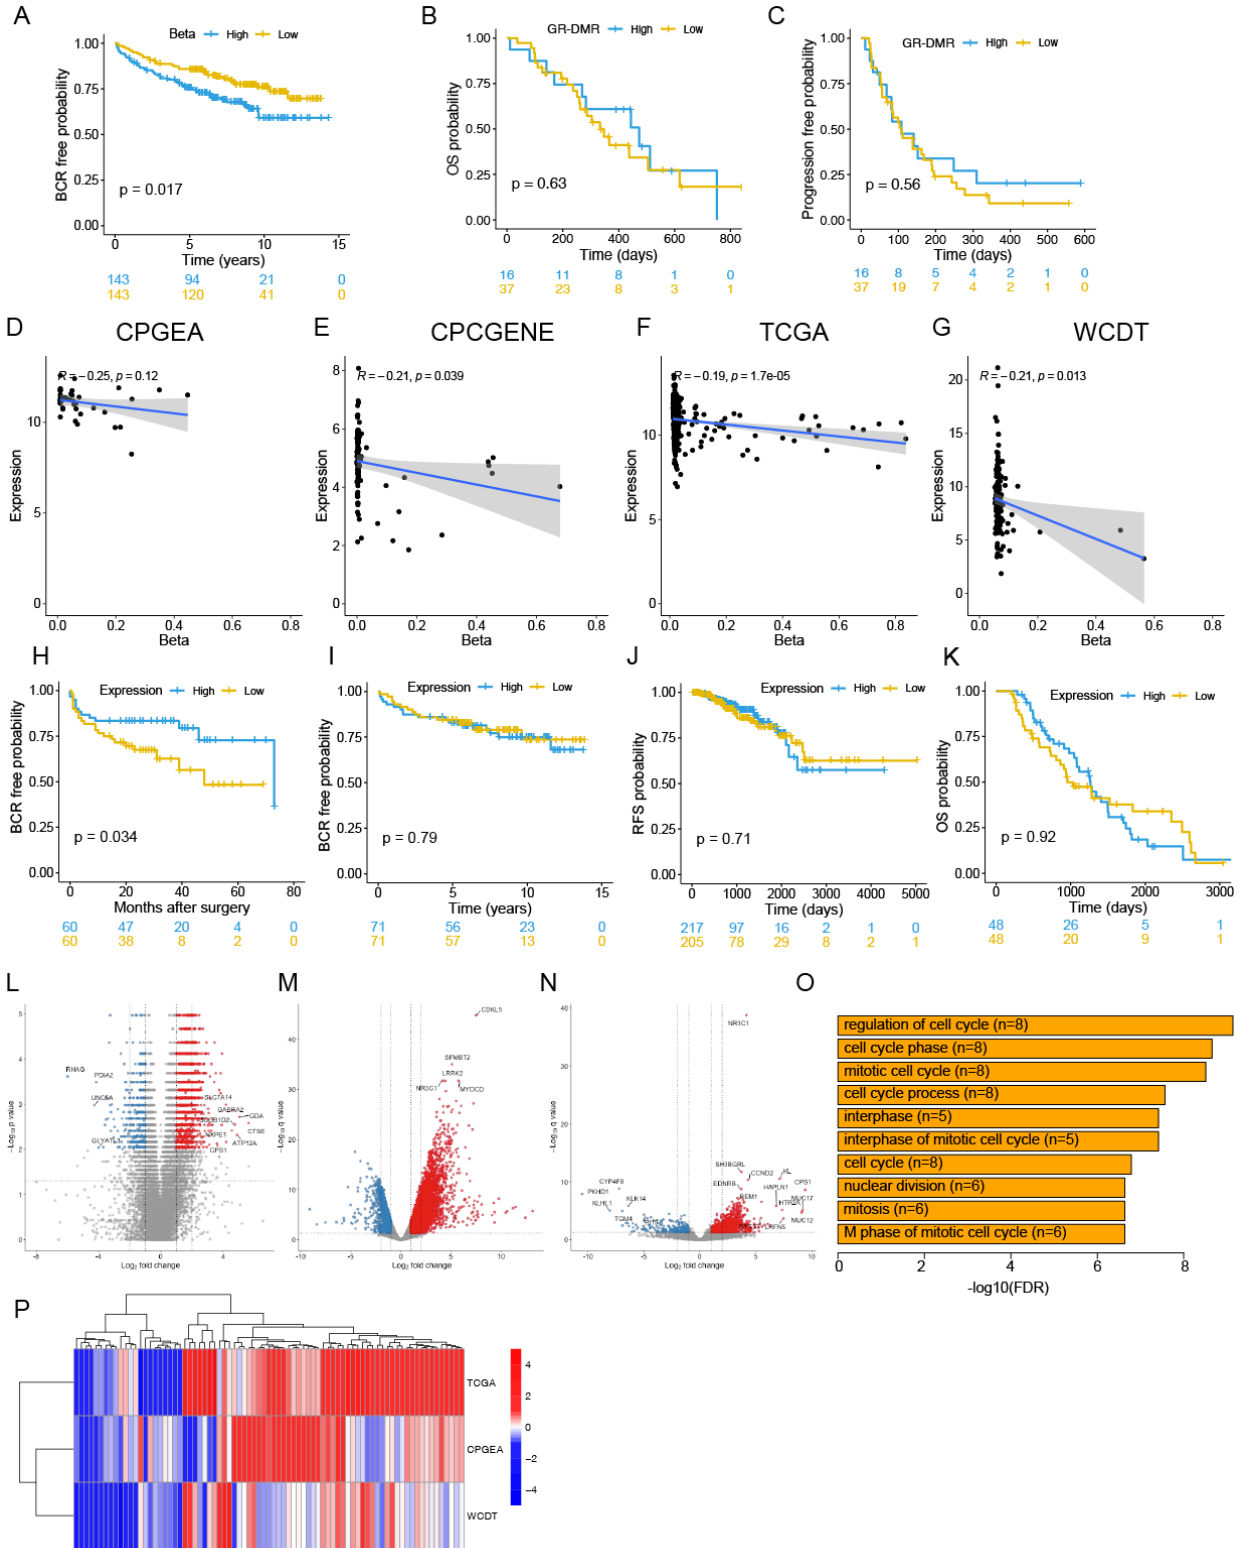

57

58 Supplementary Figure 3. Characterization of the GR site. Related to Figure 3

59 A) Association between GR site methylation and disease outcome in the localized  
60 samples from CPC cohort. BCR, biochemical recurrence. Association of GR site  
61 methylation measured by cfMeDIP-seq data with overall survival B) and progression free  
62 survival C) in mCRPC samples from the VPC cohort. Logrank test was used to calculate  
63 p-values. X = 143 and 144; 16 and 37; 16 and 37 independent observations for the high  
64 and low risk groups in A), B) and C) respectively. Pearson correlation between GR  
65 expression and methylation in the localized samples from CPGEA D), CPC E), TCGA F)  
66 and mCRPC samples from WCDT G) cohorts. P-values were calculated using two-sided  
67 *t*-test. Association between GR gene expression and disease outcome in the localized  
68 samples from CPGEA H), CPC I), TCGA J) and mCRPC samples from WCDT K) cohorts.  
69 Logrank test was used to calculate p-values. X = 60 and 60; 71 and 71; 217 and 205; 48  
70 and 48 26 independent observations for the high and low risk groups in H), I), J), K)  
71 respectively. Volcano plots showing the differential gene expression analysis in GR-DMR  
72 methylation high compared to low groups in CPGEA L), TCGA M) and WCDT N) cohorts.  
73 O) Gene ontology (GO) analysis showing the enrichment of Biological Process (BP) for  
74 genes up regulated in high GR-DMR methylation groups in CPGEA. P) Log<sub>2</sub> transformed  
75 fold change in L-N) for genes in BP terms shown in O). Only genes that are differentially  
76 regulated in at least one of the comparisons are shown. Source data for Supplementary  
77 Figures 3D-G are provided as a Source Data file.

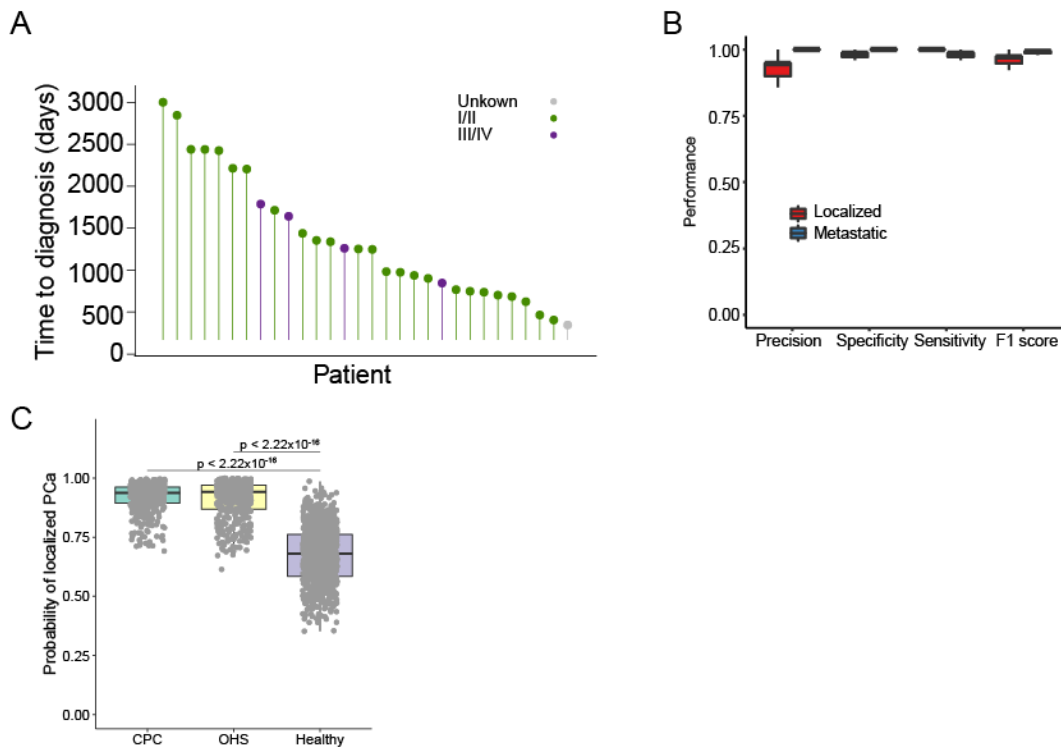

79 Supplementary Figure 4. Methylation profiles show distinction between samples of  
80 different disease status. Related to Figure 4

81 A) Time to diagnosis for samples from the Ontario Health Study (OHS). B) Performance  
82 statistics for the classifier distinguishing localized and metastatic samples for the 50  
83 models. Box plots represent median values and 0.25 and 0.75 quantiles. Whiskers  
84 represent 1.5x interquartile range (IQR). X = 50 observations from 50 repeats for both  
85 “Localized” and “Metastatic” predictions. C) Probability distribution for localized samples  
86 from the CPC cohort and healthy controls from Burgener et al<sup>1</sup>. Box plots represent  
87 median values and 0.25 and 0.75 quantiles. Two-sided Mann-Whitney U test was used  
88 to calculate pairwise p-values. Whiskers represent 1.5x interquartile range (IQR). X = 450,  
89 450 and 1,000 observations pooled from 50 repeats for the CPC, OHS and HC cohorts,  
90 respectively. Source data for Supplementary Figures 4B-C are provided as a Source Data  
91 file.



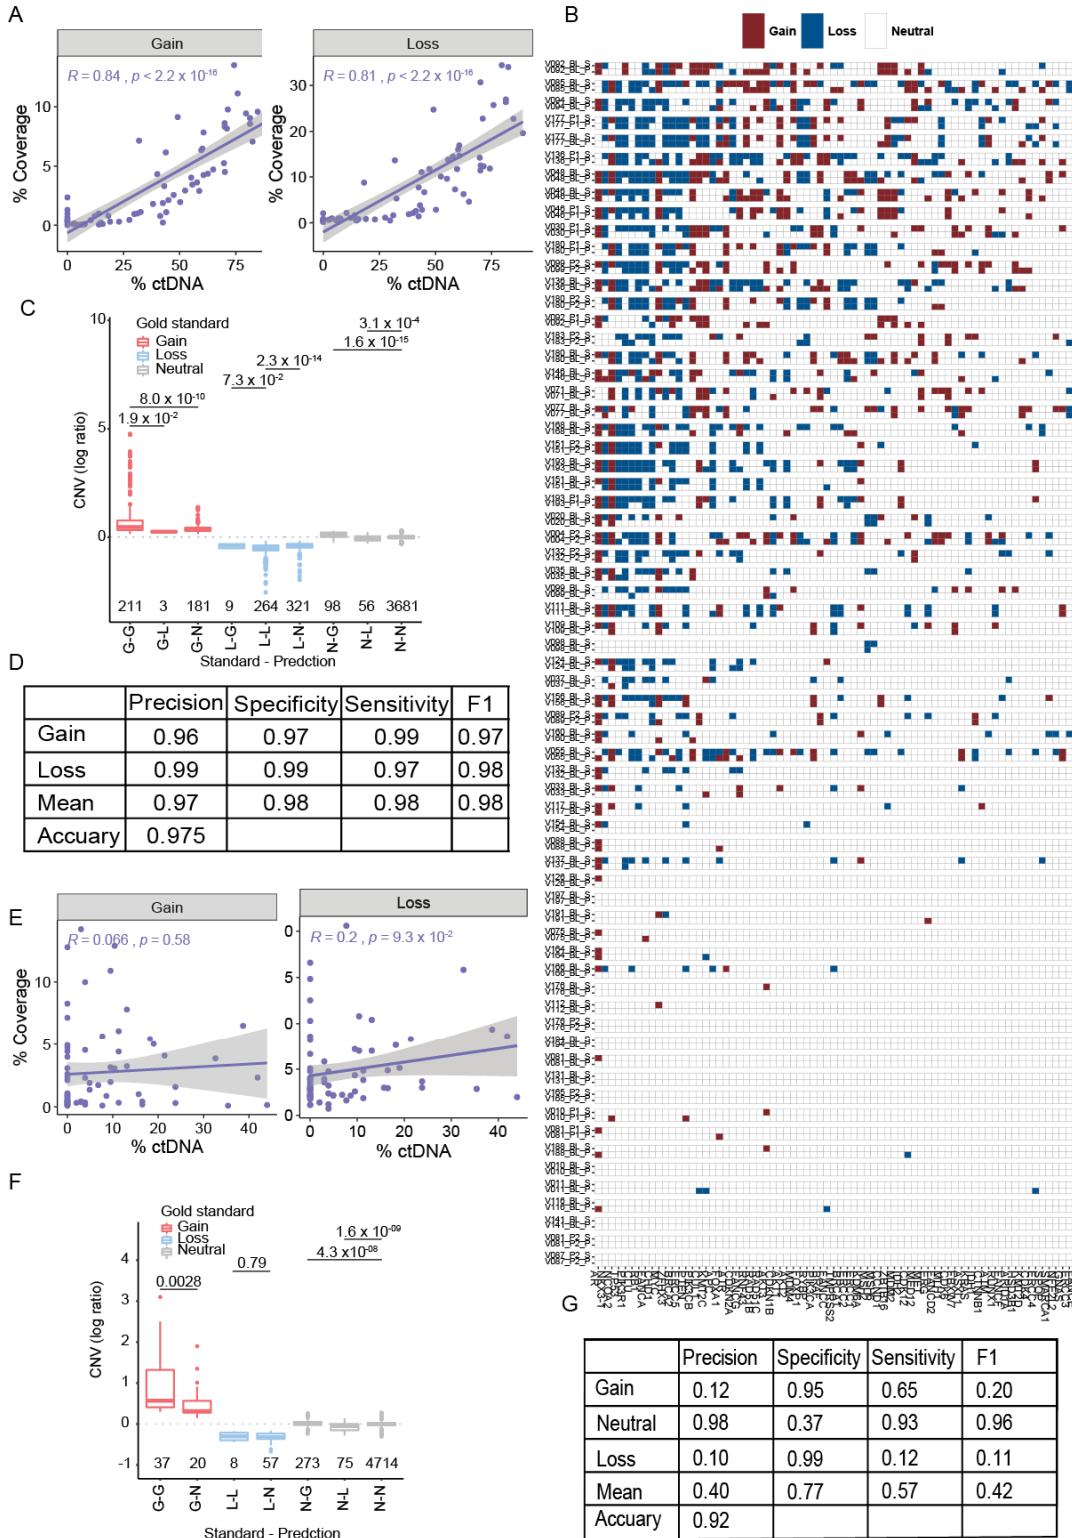

94 Supplementary Figure 5. cfMeDIP-seq data can predict sample CNV with high accuracy.  
 95 Related to Figure 5

96 A) Pearson correlation between CNA coverage and %ctDNA in mCRPC samples from  
97 the VPC cohort. P-value was calculated using two-sided *t*-test. B) Comparison of gene  
98 CNA between standard status obtained from previous panel sequencing and predicted  
99 results from cfMeDIP-seq data for the remaining 57 samples from Figure 5C. C)  
100 Distribution of CNA degree among different prediction types. Two-sided Mann-Whitney U  
101 test was used to calculate pairwise p-values between different types. Box plots represent  
102 median values and 0.25 and 0.75 quantiles. Whiskers represent 1.5x interquartile range  
103 (IQR). Number below each box represents the number of independent observations for  
104 each group. D) The performance and accuracy of CNA prediction for genes with altered  
105 copy number in mCRPC samples from the VPC cohort. E) Pearson correlation between  
106 CNA coverage and %ctDNA in mCRPC samples from the VPC-V cohort. P-value was  
107 calculated using two-sided *t*-test. F) Distribution of CNA degree among different prediction  
108 types for mCRPC samples from VPC-V cohort. Two-sided Mann-Whitney U test was used  
109 to calculate pairwise p-values. Box plots represent median values and 0.25 and 0.75  
110 quantiles. Whiskers represent 1.5x interquartile range (IQR). Number below each box  
111 represents the number of independent observations for each group. G) The performance  
112 and accuracy for CNA prediction in mCRPC samples from the VPC-V cohort. Source data  
113 for Supplementary Figures 5A, Supplementary Figures 5C-F are provided as a Source  
114 Data file.

115

116

## 117 **References:**

118

- 119 1 Burgener, J. M. *et al.* Tumor-Naive Multimodal Profiling of Circulating Tumor  
120 DNA in Head and Neck Squamous Cell Carcinoma. *Clin Cancer Res* **27**, 4230-  
121 4244, doi:10.1158/1078-0432.CCR-21-0110 (2021).
- 122 2 Yegnasubramanian, S. *et al.* DNA hypomethylation arises later in prostate cancer  
123 progression than CpG island hypermethylation and contributes to metastatic  
124 tumor heterogeneity. *Cancer Res* **68**, 8954-8967, doi:10.1158/0008-5472.CAN-  
125 07-6088 (2008).
- 126 3 Du, M. *et al.* Plasma cell-free DNA-based predictors of response to abiraterone  
127 acetate/prednisone and prognostic factors in metastatic castration-resistant  
128 prostate cancer. *Prostate Cancer Prostatic Dis* **23**, 705-713, doi:10.1038/s41391-  
129 020-0224-4 (2020).
- 130 4 Liu, S. H. *et al.* DriverDBv3: a multi-omics database for cancer driver gene  
131 research. *Nucleic Acids Res* **48**, D863-D870, doi:10.1093/nar/gkz964 (2020).
- 132 5 Li, J. *et al.* A genomic and epigenomic atlas of prostate cancer in Asian  
133 populations. *Nature* **580**, 93-99, doi:10.1038/s41586-020-2135-x (2020).
- 134 6 Zhao, S. G. *et al.* The DNA methylation landscape of advanced prostate cancer.  
135 *Nat Genet* **52**, 778-789, doi:10.1038/s41588-020-0648-8 (2020).

136
